# Supplementary material for: A Novel Nomogram for Predicting Postoperative Liver Failure After Major Hepatectomy for Hepatocellular Carcinoma
Source: PubMed Central journal article supplement (PMC8964030; doi:10.3389/fonc.2022.817895), 2022-03-14

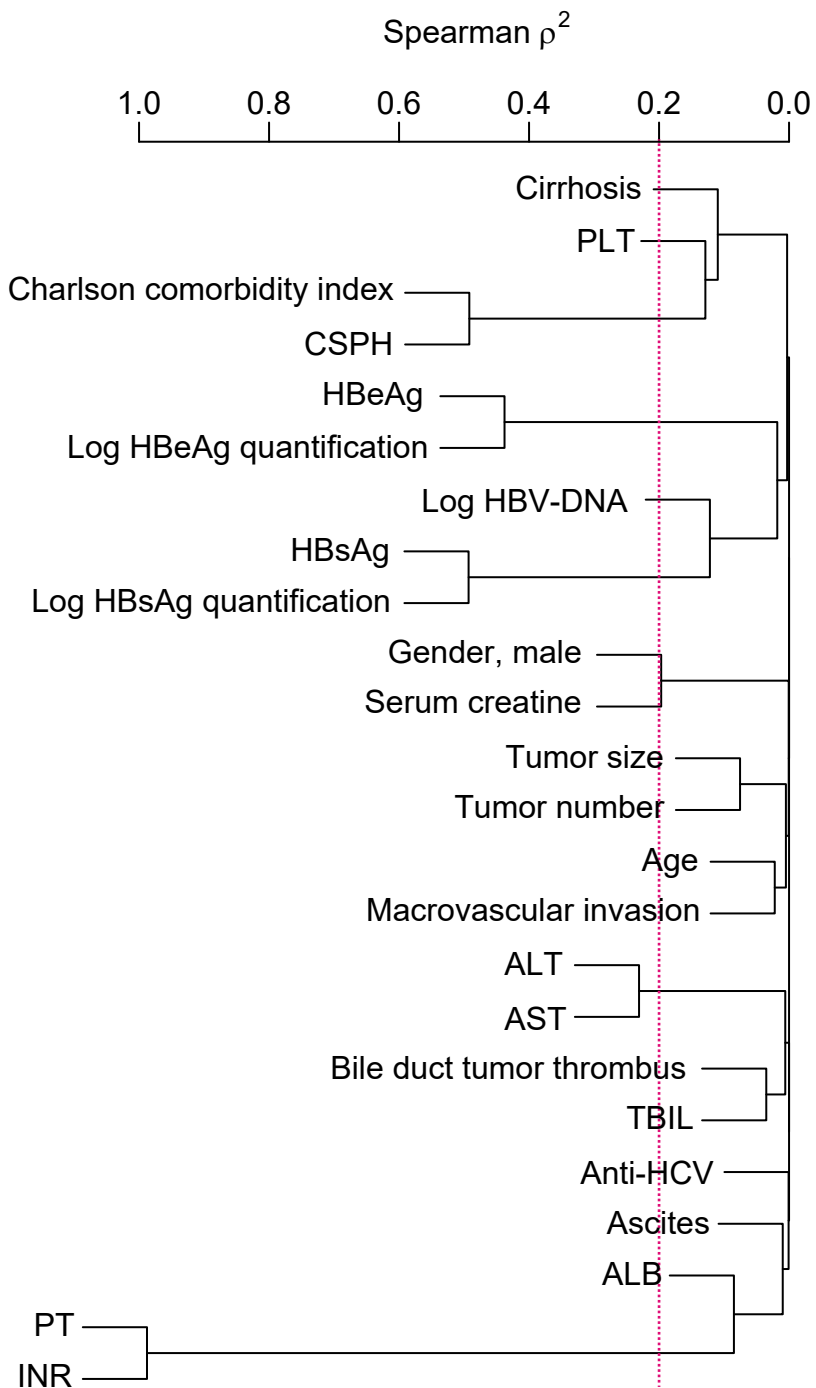

Supplement: DataSheet_1.pdf [file DataSheet_1.pdf]
