# Supplementary material for: A Novel Nomogram for Predicting Postoperative Liver Failure After Major Hepatectomy for Hepatocellular Carcinoma
Source: PubMed Central journal article supplement (PMC8964030; doi:10.3389/fonc.2022.817895), 2022-03-14

**A**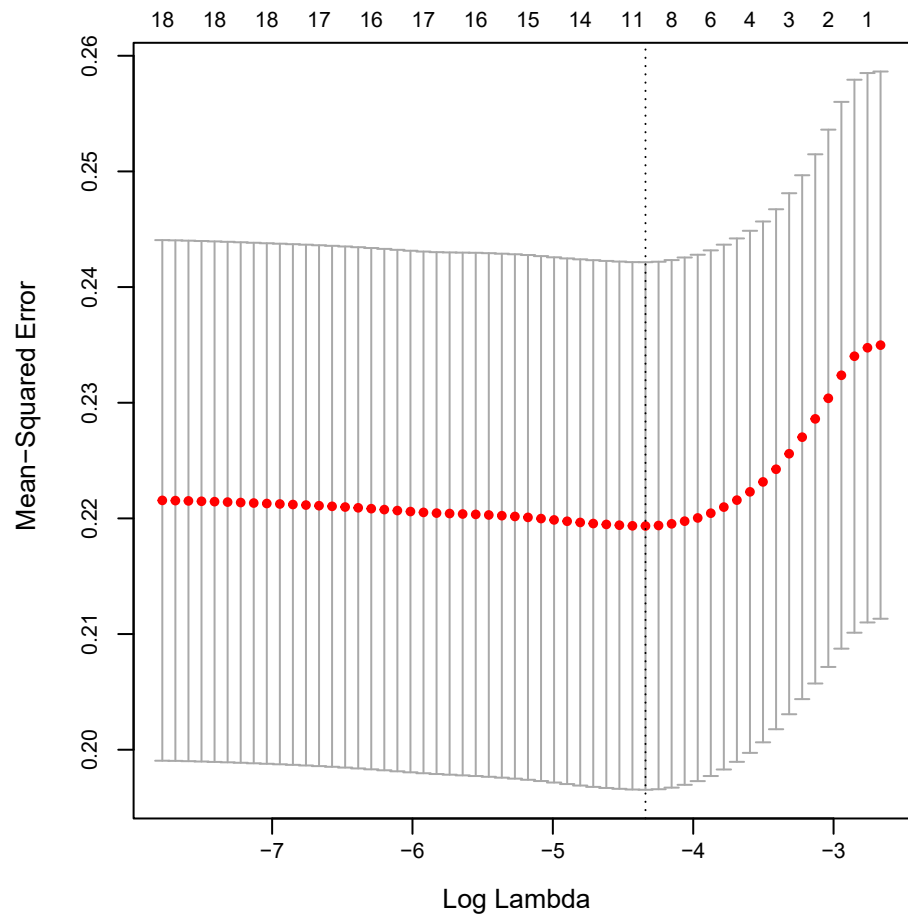**B**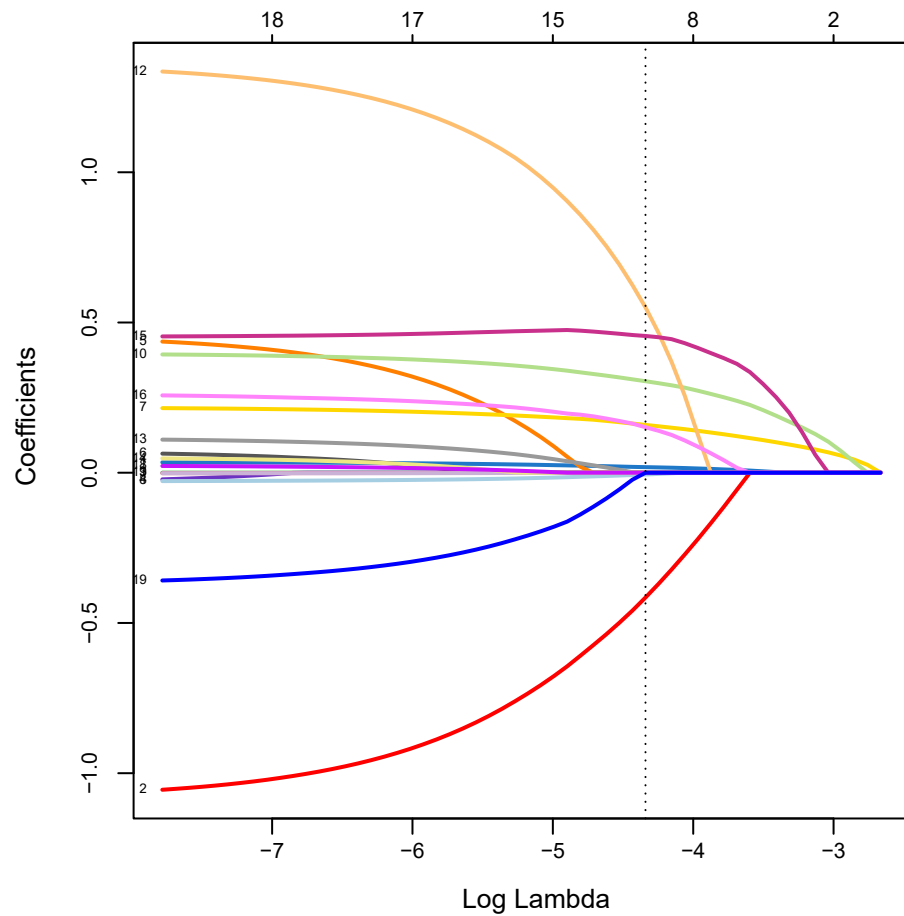

Supplement: DataSheet_2.pdf [file DataSheet_2.pdf]
